# Supplementary material for: Psychiatrists' Attitudes Toward Disruptive New Technologies: Mixed-Methods Study
Source: PubMed Central journal article supplement (PMC6315247; doi:10.2196/10240), 2018-12-14
Supplement: mental_v5i4e10240_app2.pdf [file mental_v5i4e10240_app2.pdf]

1 **Acceptability model**

2

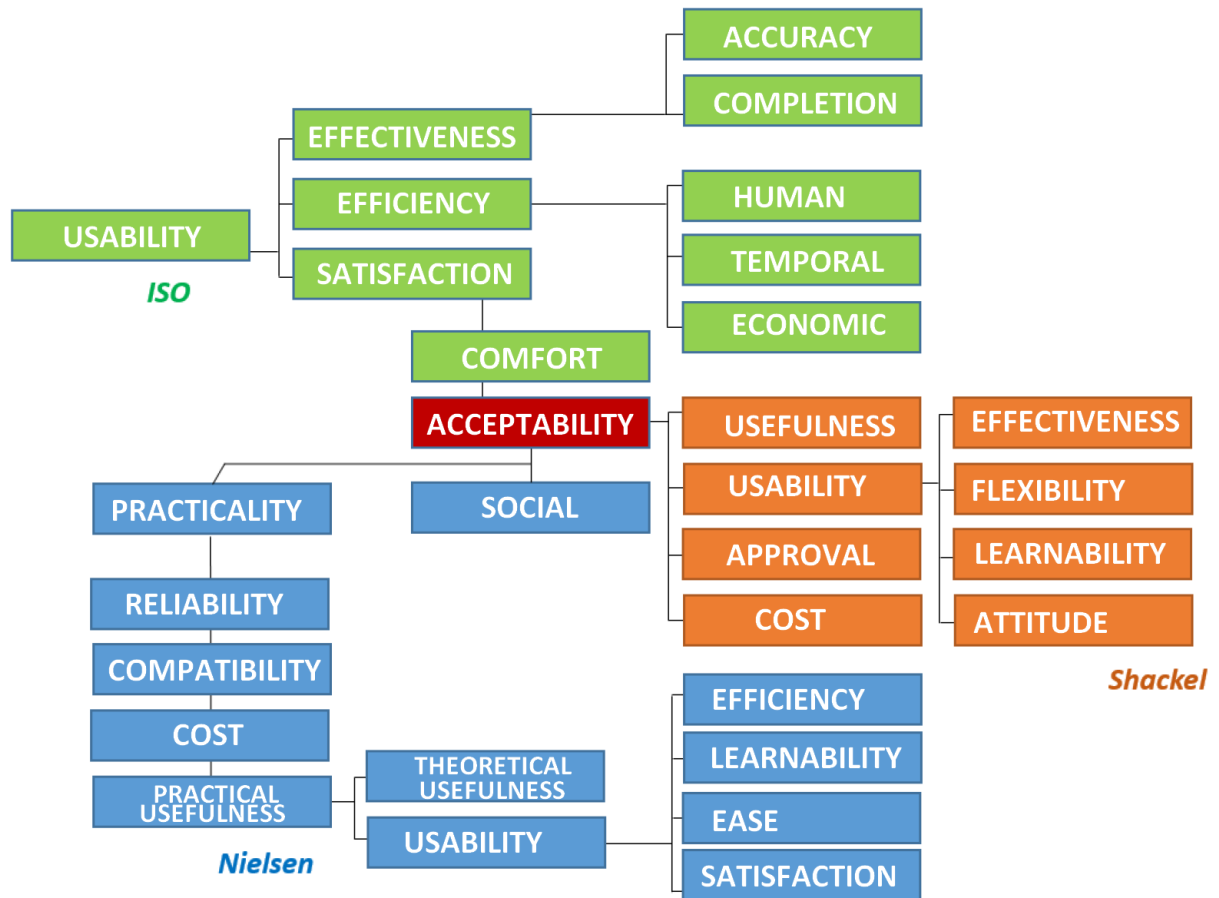

3

4 Shackel, B. Human Factors for Informatics Usability. In B. Shackel & B. Richardson (Eds.), Human Factors 5 (pp. 21-38). Cambridge: Cambridge University Press. 1991

6

7 Nielsen, J. Usability engineering. Boston: Academic Press. 1993

8

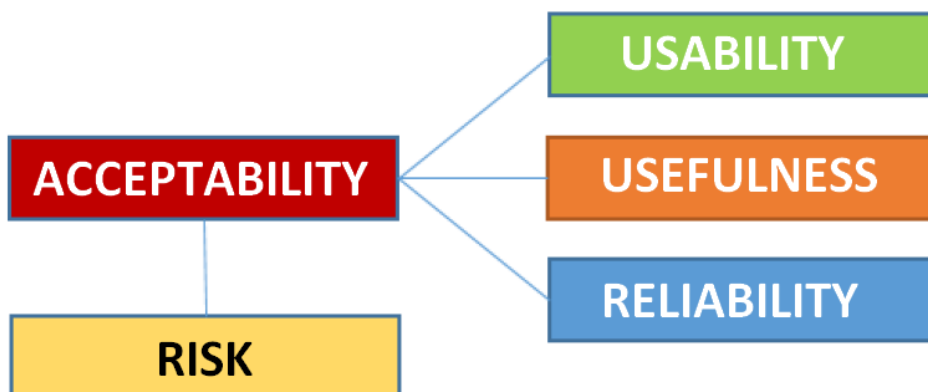

9

10

11 Our model used the primary variable of each model (ISO, Nielsen, Shackel) and add a risk assessment

12
