# Supplementary material for: Psychiatrists' Attitudes Toward Disruptive New Technologies: Mixed-Methods Study
Source: PubMed Central journal article supplement (PMC6315247; doi:10.2196/10240), 2018-12-14
Supplement: mental_v5i4e10240_app3.pdf [file mental_v5i4e10240_app3.pdf]

| <b><i>Characteristics of responders (N = 515)</i></b>               | <b><i>n (%)</i></b> |
|---------------------------------------------------------------------|---------------------|
| <b>Sex</b>                                                          |                     |
| Female                                                              | 299 (58.1)          |
| Male                                                                | 216 (41.9)          |
| <b>Year of graduation</b>                                           |                     |
| 2016-2020                                                           | 219 (42.5)          |
| 2010-2015                                                           | 123 (23.9)          |
| 2000-2009                                                           | 63 (12.2)           |
| 1990-1999                                                           | 55 (10.7)           |
| 1970-1989                                                           | 45 (8.7)            |
| <i>Not indicated</i>                                                | 10 (1.9)            |
| <b>Role</b>                                                         |                     |
| Resident                                                            | 241 (46.8)          |
| Hospital practitioner                                               | 148 (28.7)          |
| Liberal practitioner                                                | 49 (9.5)            |
| Assistant practitioner                                              | 41 (8)              |
| Professor                                                           | 20 (3.9)            |
| Assistant professor                                                 | 16 (3.1)            |
| <b>Practice (except residents) [n = 274]</b>                        |                     |
| Psychiatric hospital                                                | 99 (36.1)           |
| University hospital                                                 | 86 (31.4)           |
| Private or clinical practice                                        | 38 (13.9)           |
| General hospital                                                    | 22 (8)              |
| Mixed (private practice and public health service)                  | 15 (5.5)            |
| Other (association, military hospital, etc.)                        | 14 (5.1)            |
| <b>Theoretical approach</b>                                         |                     |
| Several approaches focusing on neurobiology or CBT                  | 131 (25.4)          |
| Integrative practice (must include neurobiology and psychoanalysis) | 114 (22.1)          |
| Neurobiology                                                        | 74 (14.4)           |
| Psychoanalysis                                                      | 58 (11.3)           |
| Several approach focusing on psychoanalysis                         | 41 (8)              |
| Cognitive-behavioral therapy (CBT)                                  | 41 (8)              |
| Systemic                                                            | 29 (5.6)            |
| Other                                                               | 11 (2.1)            |
| <i>Not provided</i>                                                 | 16 (3.4)            |
| <b>Area of expertise</b>                                            |                     |
| Adult psychiatry                                                    | 270 (52.4)          |
| Child psychiatry                                                    | 91 (17.7)           |
| Mixed (adult and child psychiatry)                                  | 51 (9.9)            |

|                           |          |
|---------------------------|----------|
| Addiction medicine        | 34 (6.6) |
| Geriatric psychiatry      | 29 (5.6) |
| Forensic psychiatry       | 21 (4.1) |
| Several areas of practice | 17 (3.3) |
| <i>Not provided</i>       | 2 (0.4)  |

1

2

***Psychiatrists' professional culture***

| <b>Subtype</b>              | <b>Medical</b>                                          | <b>Intermediate</b>                                         | <b>Psychological</b>                    |
|-----------------------------|---------------------------------------------------------|-------------------------------------------------------------|-----------------------------------------|
| <b>Sex</b>                  | Male                                                    | <i>ns</i>                                                   | Female                                  |
| <b>Theoretical approach</b> | Neurobiological                                         | CBT<br>Integrative<br>Systemic                              | Psychoanalytic                          |
| <b>Practice</b>             | Adult psychiatry<br>Addictology<br>Geriatric psychiatry | <i>ns</i>                                                   | Child psychiatry<br>Forensic psychiatry |
| <b>Role</b>                 | Professor<br>Assistant professor                        | Hospital practitioner<br>Assistant practitioner<br>Resident | Private practitioner                    |
| <b>Year of graduation</b>   | 1990-2009                                               | 2010-2020                                                   | 1970-1989                               |

3
